# Supplementary material for: Persimmon Leaves (Diospyros kaki) Extract Protects Optic Nerve Crush-Induced Retinal Degeneration
Source: PubMed Central journal article supplement (PMC5397840; doi:10.1038/srep46449), 2017-04-20
Supplement: srep46449-s1.pdf [file srep46449-s1.pdf]

Supplementary Information

**Persimmon Leaves (*Diospyros kaki*) Extract Protects Optic Nerve  
Crush-Induced Retinal Degeneration**

Hong Ryul Ahn<sup>a</sup>, Kyung-A Kim<sup>a,b</sup>, Suk Woo Kang<sup>a</sup>, Joo Young Lee<sup>a</sup>,

Tae-Jin Kim<sup>a,b,c,\*</sup> and Sang Hoon Jung<sup>a,b,\*</sup>

<sup>a</sup>Natural Products Research Center, Korea Institute of Science and Technology (KIST), Gangneung 25451, <sup>b</sup>Department of Biological Chemistry, Korea University of Science and Technology (UST), Daejeon 34113, <sup>c</sup>Department of Biological Sciences, Pusan National University, Busan 46241, Republic of Korea

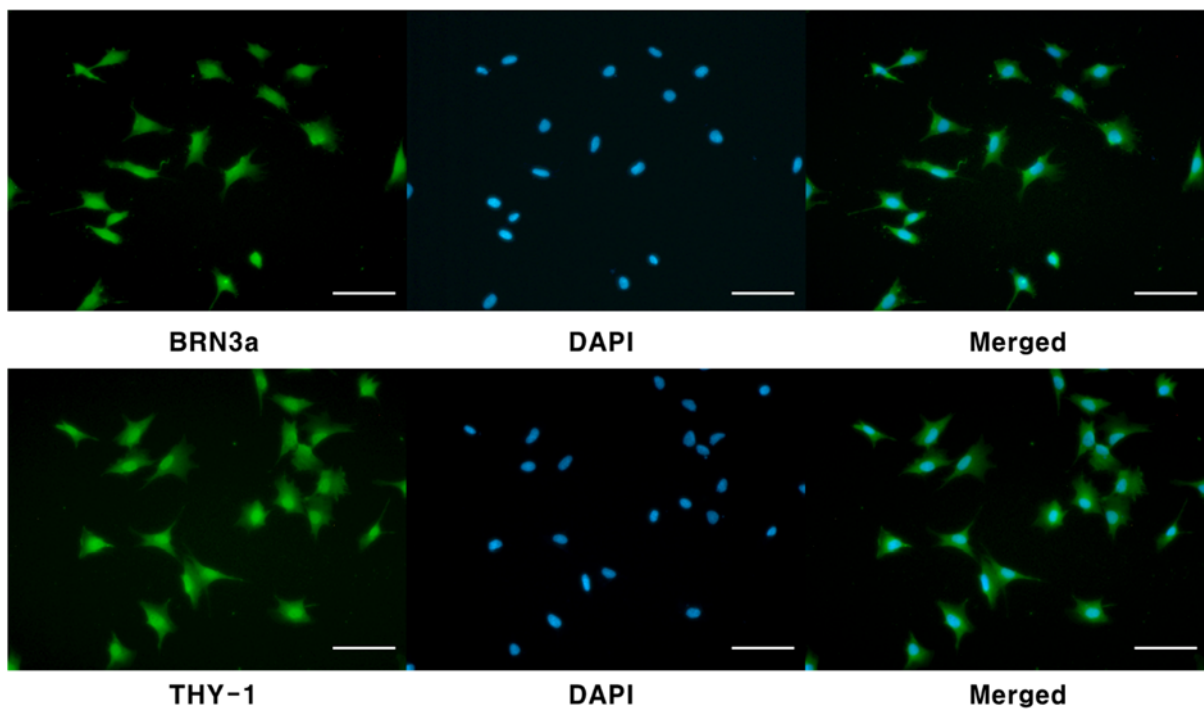

**Supplementary Figure 1.** Immunofluorescence of THY-1 and BRN3a proteins in RGC-5 cells. DAPI was used to visualize nuclei. Scale bar = 50  $\mu\text{m}$ .

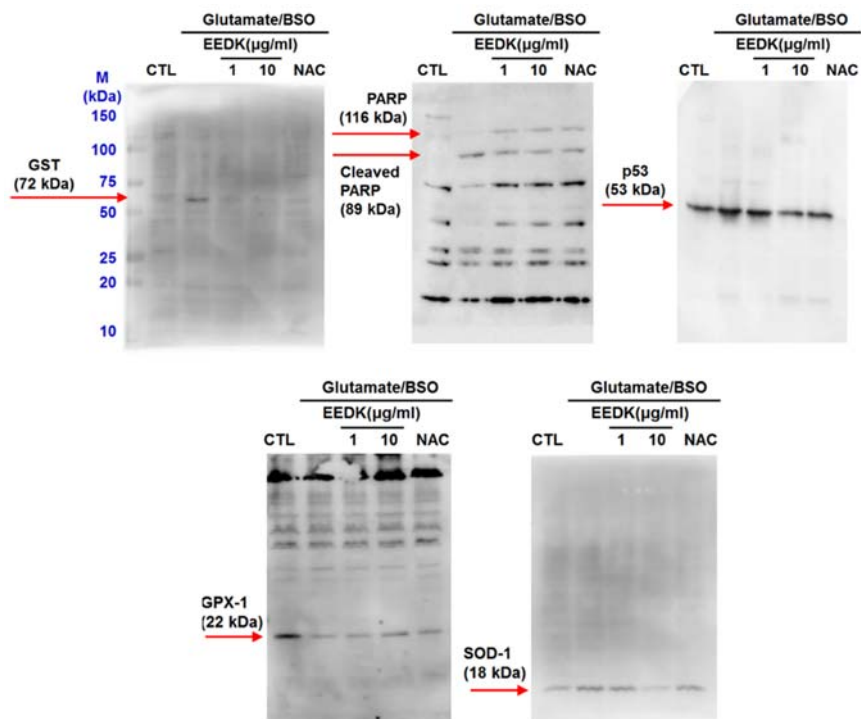

**Supplementary Figure 2.** Entire lanes from western blots showing the effect of EEDK on protein-expression levels in response to glutamate/BSO.

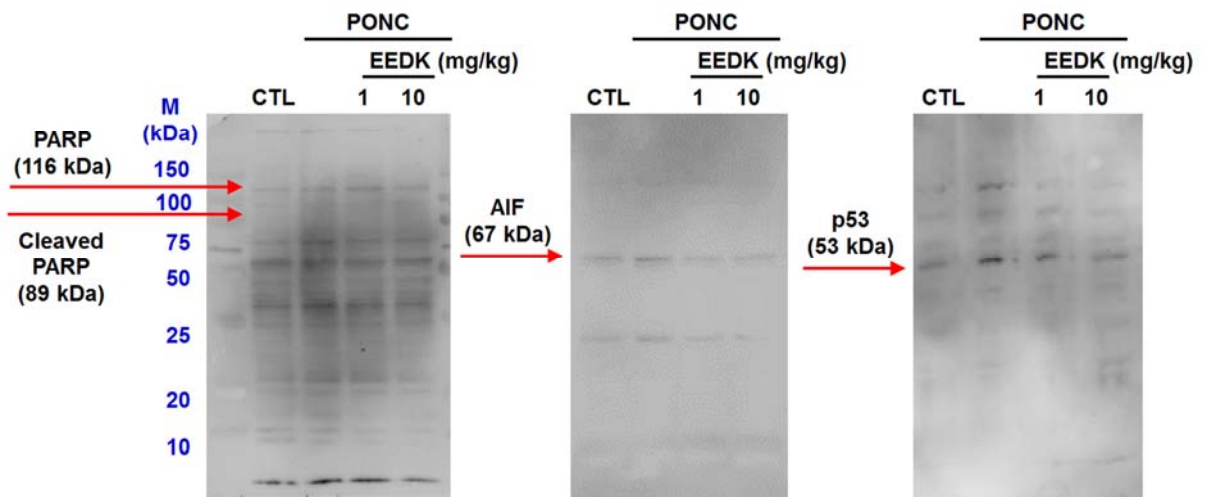

**Supplementary Figure 3.** Entire lanes from western blots showing the effect of EEDK on protein-expression levels in PONC-induced mice retinas.

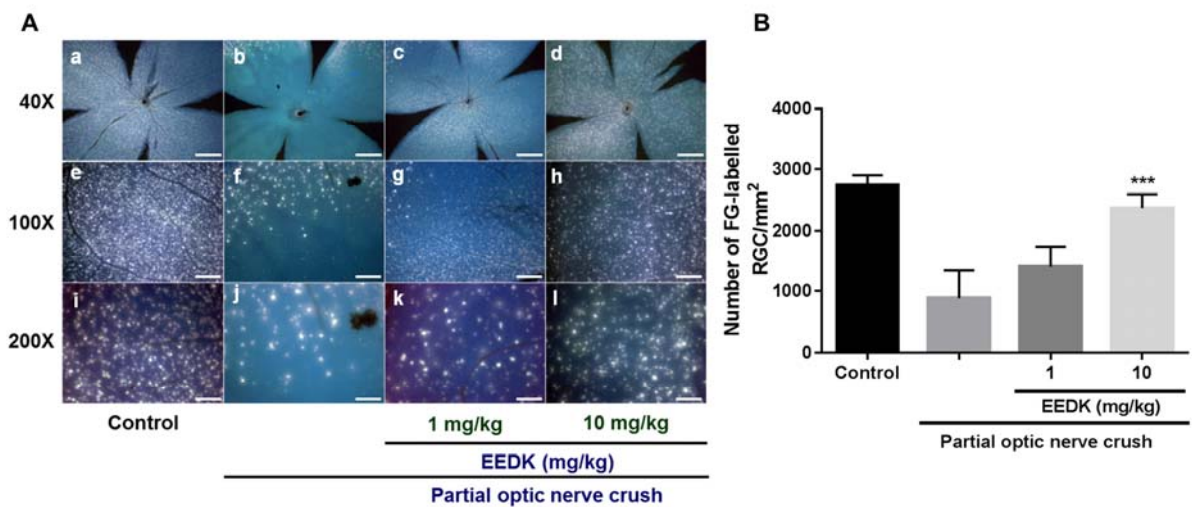

**Supplementary Figure 4.** Effect of EEDK on RGC survival in retinas at 1 week after PONC. (A) Representative fluorescence images of retrograde-labelled RGCs in PONC-induced mice: (a) control, (b) vehicle, (c) 1 mg/kg EEDK-treated, and (d) 10 mg/kg EEDK-treated groups. Scale bar = 500  $\mu$ m. Low-magnification ( $\times 100$ ) images of labelled RGCs in a–d are shown in e–h. Scale bars in d–f represent 200  $\mu$ m. High magnification ( $\times 200$ ) images of a–d are shown in i–l. Scale bars in i–l represent 100  $\mu$ m. (B) The bar graph shows quantitative analysis of the RGC density (cells/mm<sup>2</sup>) ( $^{***}p < 0.001$ , mean  $\pm$  S.E.M. n = 8 from each group).

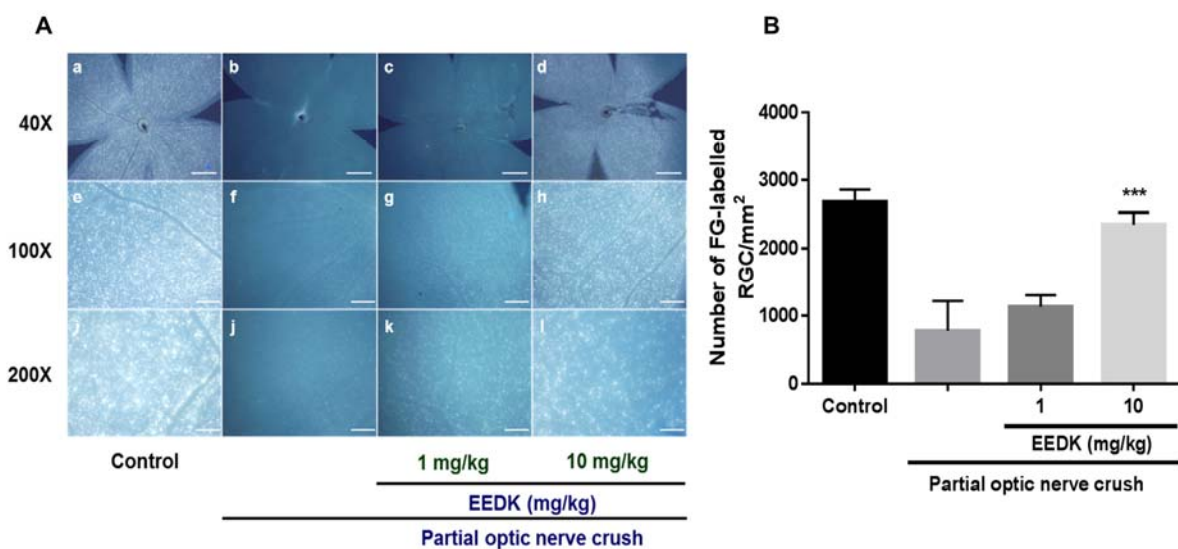

**Supplementary Figure 5.** Effect of EEDK on RGC survival in damaged retinas at 4 weeks after PONC. (A) Representative fluorescence images of retrograde-labelled RGCs in PONC-induced mice: (a) control, (b) vehicle, (c) 1 mg/kg EEDK-treated, and (d) 10 mg/kg EEDK-treated groups. Scale bar = 500  $\mu\text{m}$ . Low-magnification ( $\times 100$ ) images of labelled RGCs in a–d are shown in e–h. Scale bars in d–f represent 200  $\mu\text{m}$ . High magnification ( $\times 200$ ) images of a–d are shown in i–l. Scale bars in i–l represent 100  $\mu\text{m}$ . (B) The bar graph shows quantitative analysis of the RGC density (cells/ $\text{mm}^2$ ) ( $***p < 0.001$ , mean  $\pm$  S.E.M.  $n = 8$  from each group).
